# Supplementary material
Source: HighWire-hosted journal article supplement (https://ard.bmj.com/content/75/11/1979)
Supplement: inline-supplementary-material-3 [file inline-supplementary-material-3.pdf]

**Supplemental Table S1.** Incidence of adverse events (safety population; n=43)

| <b>Parameter</b>                          | <b>VX-509</b>             |                          |                          |                          | <b>All VX-509<br/>(n=31)</b> |
|-------------------------------------------|---------------------------|--------------------------|--------------------------|--------------------------|------------------------------|
|                                           | <b>Placebo<br/>(n=12)</b> | <b>100 mg<br/>(n=11)</b> | <b>200 mg<br/>(n=10)</b> | <b>300 mg<br/>(n=10)</b> |                              |
| Total AEs, n                              | 6                         | 13                       | 23                       | 25                       | 61                           |
| Patients with ≥1 AE, n %                  | 5 (41.7)                  | 8 (72.7)                 | 8 (80.0)                 | 9 (90.0)                 | 25 (80.6)                    |
| Treatment-related AEs, n %                | 1 (8.3)                   | 3 (27.3)                 | 4 (40.0)                 | 5 (50.0)                 | 12 (38.7)                    |
| AEs leading to study discontinuation, n % | 0                         | 0                        | 0                        | 2 (20.0)                 | 2 (6.5)                      |
| AEs leading to death, n                   | 0                         | 0                        | 0                        | 0                        | 0                            |
| Serious AEs, n (%)                        | 0                         | 1 (9.1)                  | 1 (10.0)                 | 0                        | 2 (6.5)                      |
| Most common AEs, n (%)                    |                           |                          |                          |                          |                              |
| Diarrhea                                  | 0                         | 0                        | 1 (10.0)                 | 2 (20.0)                 | 3 (9.7)                      |
| Gastroesophageal reflux disease           | 0                         | 1 (9.1)                  | 2 (20.0)                 | 0                        | 3 (9.7)                      |
| Sinus congestion                          | 0                         | 1 (9.1)                  | 1 (10.0)                 | 1 (10.0)                 | 3 (9.7)                      |

AE, adverse event.
